# Supplementary material
Source: publisher site journal article supplement (https://www.dovepress.com/get_supplementary_file.php?f=180520T2.xlsx)
Supplement: Supplementary file 1 [file get_supplementary_file.php]

## Sheet: Table S2
Primers list
ID	Primer	sequences(5'to3')
GLUT1F	F	CTTTGTGGCCTTCTTTGAAGT
GLUT1R	R	CCACACAGTTGCTCCACAT
HK2F	F	GATTGTCCGTAACATTCTCATCGA
HK2R	R	TGTCTTGAGCCGCTCTGAGAT
GLUT4F	F	TGGAAGGAAAAGGGCCATGCTG
GLUT4R	R	CAATGAGGAATCGTCCAAGGATG
G6PF	F	GGTACACAGGCAAGACCATC
G6PR	R	GTTTTGGCAATGTGAGTTCC
PFKMF	F	GATACTATGGATGATCCAGACAC
PFKMR	R	GACAGCAATGGCTTTGCCAATC
PFKLF	F	CACAGGTGCCAACATCTTCCGCA
PFKLR	R	TCATGTCGGTGCCGCAGAAGTCG
PFKPF	F	AGAGGACCTTCGTTCTGGAGGT
PFKPR	R	GGGCACGGTTCTCCGAGAGTTT
ALDOAF	F	GTTATCAAATCCAAGGGCGGTGTT
ALDOAR	R	AGTCAGCTCCGTCCTTCTTGTAC
ALDOBF	F	CACCATTCAAGGGCTTGATGGCCT
ALDOBR	R	TTCCTGGATAGCGAGGCTGGAT
PGK1F	F	CAAGGTTAAAGCCGAGCCAGCCAA
PGK1R	R	GCCTTCTGTGGCAGATTGACTCC
PGAM1F	F	ATGATGTCCCACCACCTCCGAT
PGAM1R	R	ATCCTTCAGACTCTCACAGGAG
ENO1F	F	GCTCCGGGACAATGATAAGACTCG
ENO1R	R	CTGTTCCATCCATCTCGATCATC
ENO2F	F	TGAAGGCAGTGGACCACATCAACT
ENO2R	R	AGAGACACACCCAGGATGGCATT
PKM2F	F	CAAAGGACCTCAGCAGCCATGTC
PKM2R	R	GGGAAGCTGGGCCAATGGTACAGA
LDHAF	F	TGGAGATTCCAGTGTGCCTGTATGG
LDHAR	R	CACCTCATAAGCACTCTCAACCACC
LDHBF	F	GGAAGGAAGTGCATAAGATGGTGG
LDHBR	R	CCCCTTTACCATTGTTGACACG
PKM1F	F	CTATCCTCTGGAGGCTGTGC
PKM1R	R	CCATGAGGTCTGTGGAGTGA
TXNIPF	F	AAGTTCGGCTTTGAGCTTCCTCAG
TXNIPR	R	CAGACACAGGTGCCATTAAATCAG
hIDH1-F	F	CACTACCGCATGTACCAGAAAGG
hIDH1-R	R	TCTGGTCCAGGCAAAAATGG
hME1-F	F	CTGCCTGTCATTCTGGATGT
hME1-R	R	ACCTCTTACTCTTCTCTGCC
hMTHFD2-F	F	TGTCCTCAACAAAACCAGGG
hMTHFD2-R	R	TTCCTCTGAAATTGAAGCTGG
hNQO1-F	F	GTCATTCTCTGGCCAATTCAGAGT
hNQO1-R	R	TTCCAGGATTTGAATTCGGG
hPGD-F	F	ATATAGGGACACCACAAGACGG
hPGD-R	R	GCATGAGCGATGGGCCATA
hPPAT-F	F	CGGTGCCAACATTCAAATC
hPPAT-R	R	TGGTGTGTCCAATTCCAAGA
hTALDO1-F	F	GTCATCAACCTGGGAAGGAA
hTALDO1-R	R	CAACAAATGGGGAGATGAGG
hTKT-F	F	GCTGAACCTGAGGAAGATCA
hTKT-R	R	TGTCGAAGTATTTGCCGGTG
GLUD1-F	F	GGGATTCTAACTACCACTTGCTCA
GLUD1-R	R	AACTCTGCCGTGGGTACAAT
GOT1-F	F	CAACTGGGATTGACCCAACT
GOT1-R	R	GGAACAGAAACCGGTGCTT
GPT2-F	F	CATGGACATTGTCGTGAACC
GPT2-R	R	TTACCCAGGACCGACTCCTT
PSAT1-F	F	CGGTCCTGGAATACAAGGTG
PSAT1-R	R	AACCAAGCCCATGACGTAGA
HIF1a-F	F	CACAGGCCACATTCACGTA
HIF1a-R	R	ATCCAGGCTGTGTCGACTG
Pim1-F	F	CGAGCATGACGAAGAGATCAT
Pim1-R	R	TCGAAGGTTGGCCTATCTGA
β-actinF	F	CTACGTCGCCCTGGACTTCGAGC
β-actinR	R	GATGGAGCCGCCGATCCACACGG
